# Supplementary material for: Delineation of glutamate pathways and secretory responses in pancreatic islets with β-cell–specific abrogation of the glutamate dehydrogenase
Source: PubMed Central journal article supplement — Mol Biol Cell. 2012 Oct 1;23(19):3851–62. doi: 10.1091/mbc.E11-08-0676 (PMC3459861; doi:10.1091/mbc.e11-08-0676), 2012-10-01

**Delineation of glutamate pathways and secretory responses in pancreatic islets with beta-cell specific deletion of the glutamate dehydrogenase.**

Vetterli et al.

**Supplemental Material**

**Supplementary Fig.S1.** Total islet insulin contents measured on islets isolated for static insulin secretion experiments. Values are means $\pm$ SD, n=25.

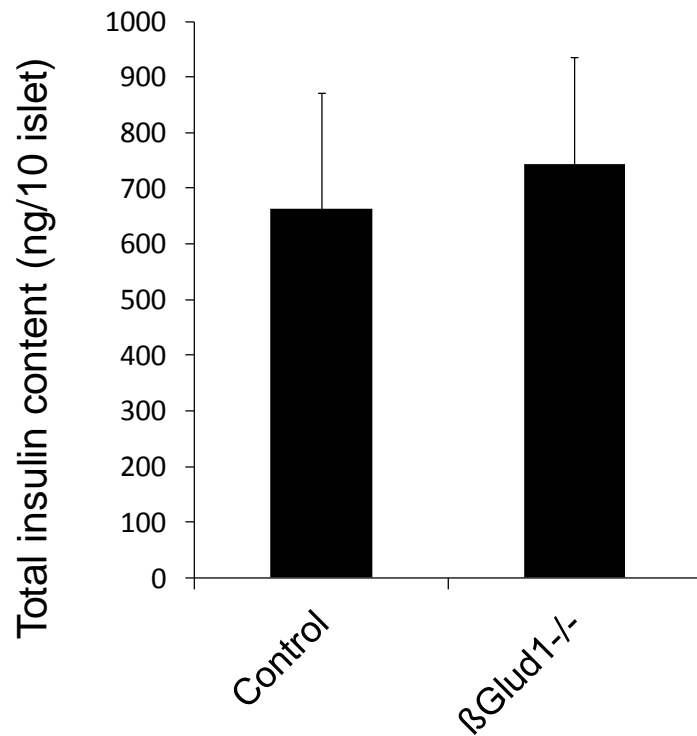

**Supplementary Fig.S2.** Lack of glutamine-induced insulin secretion in  $\beta$ Glud1<sup>-/-</sup> islets rescued by GDH over-expression. Quantification of insulin secretion depicted in Figure 2A expressed as area under the curve (AUC). After an overnight culture in RPMI-1640 medium, islets isolated from control and  $\beta$ Glud1<sup>-/-</sup> mice were hand-picked and perfused with KRBH at 2.8mM glucose (Basal). Islets were sequentially stimulated for 15min with 5mM of glutamine (Gln) and Gln plus 10mM BCH.

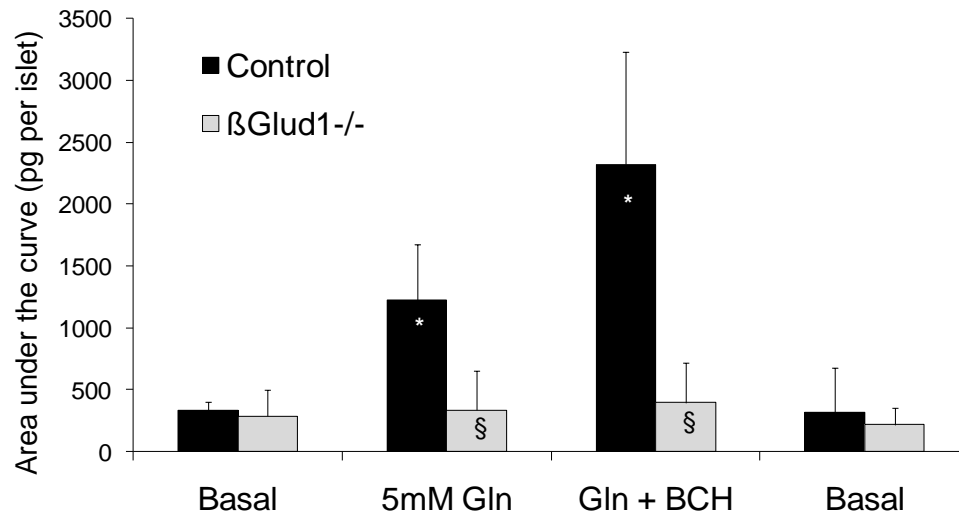

**Supplementary Fig.S3.** Secretory responses of control islets to KIC. Insulin secretion was tested in islets over a 1h incubation period at 2.8mM glucose (Basal), 22.8mM glucose (Glc), and at Basal plus 10mM  $\alpha$ -ketoisocaproate (KIC). Values are means $\pm$ SD, n=5-8, \*p<0.01 versus Basal.

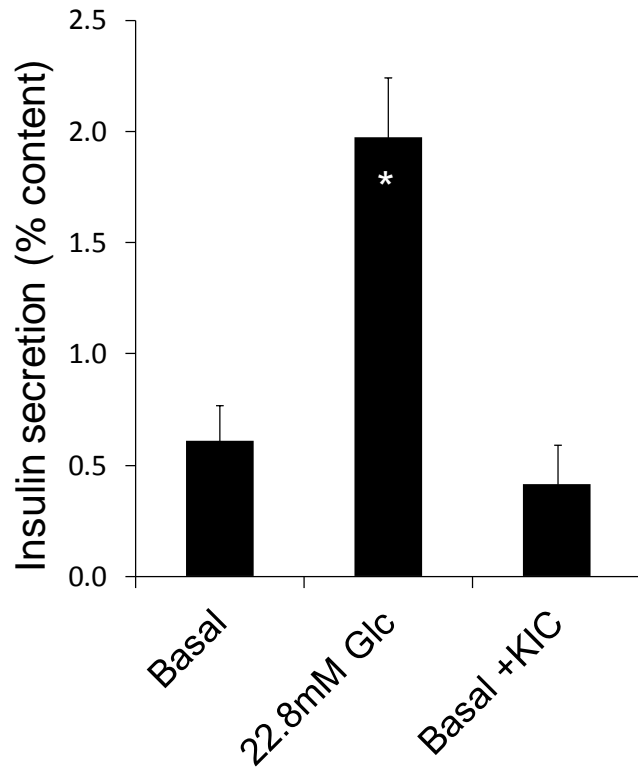

**Supplementary Fig.S4.** In situ pancreatic perfusion of control and  $\beta$ Glud1<sup>-/-</sup> mice. Pancreases were perfused with KRBH at 2.8mM glucose before 15min stimulation with 5mM glutamine plus 10mM BCH. Values are means  $\pm$  SE of 3 independent mice.

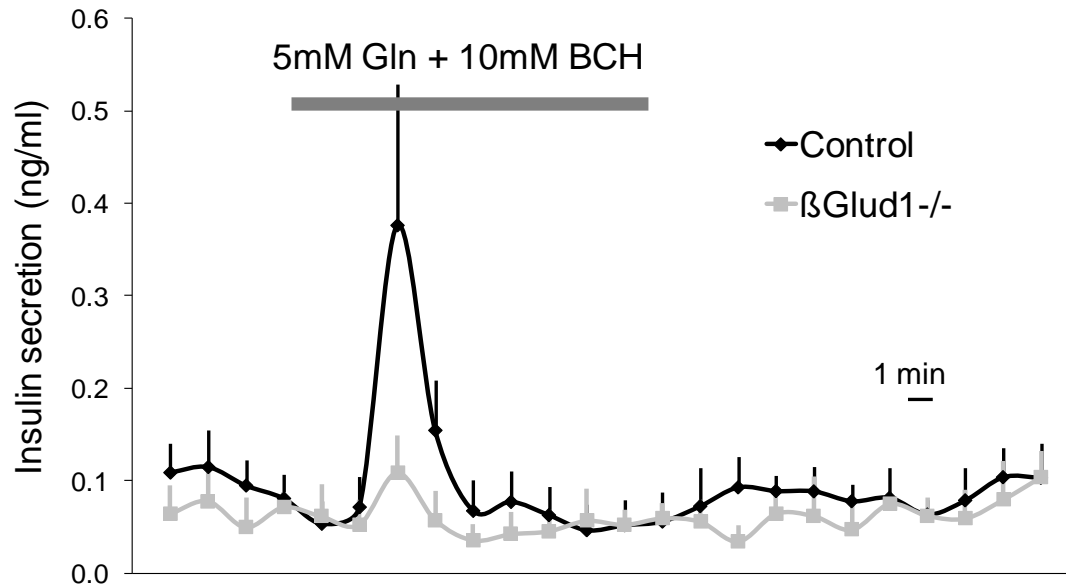

Supplement: supp_E11-08-0676_CombinedSupMats.pdf [file supp_E11-08-0676_CombinedSupMats.pdf]
